# Supplementary material for: Cobalt metal–organic framework microcrystalline particles with strong electrocatalytic activity: amine controlled morphology and OER activity
Source: Royal Society of Chemistry journal article supplement (doi:10.1039/d3nj01457f), 2023-01-01
Supplement: d3nj01457f1.pdf [file d3nj01457f1.pdf]

**Cobalt metal-organic frameworks microcrystalline particles with strong electrocatalytic activity: Amines controlled morphology and OER activity**

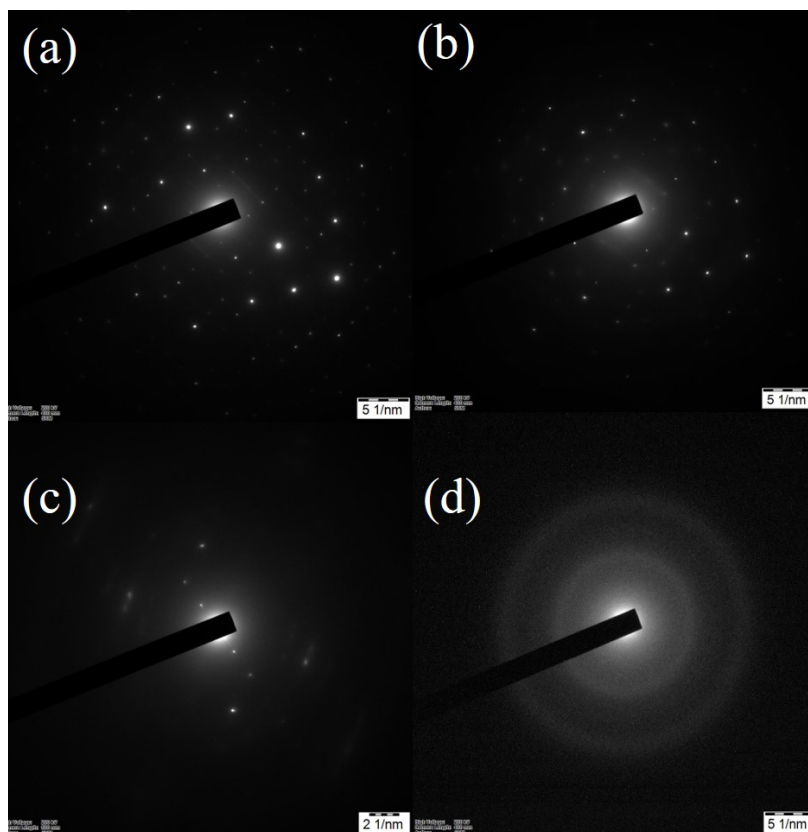

Figure S1. HR-TEM SAED pattern of (a) CoTPA-D, (b) CoTPA-B, (c) CoTPA-H and (d) CoTPA-T.

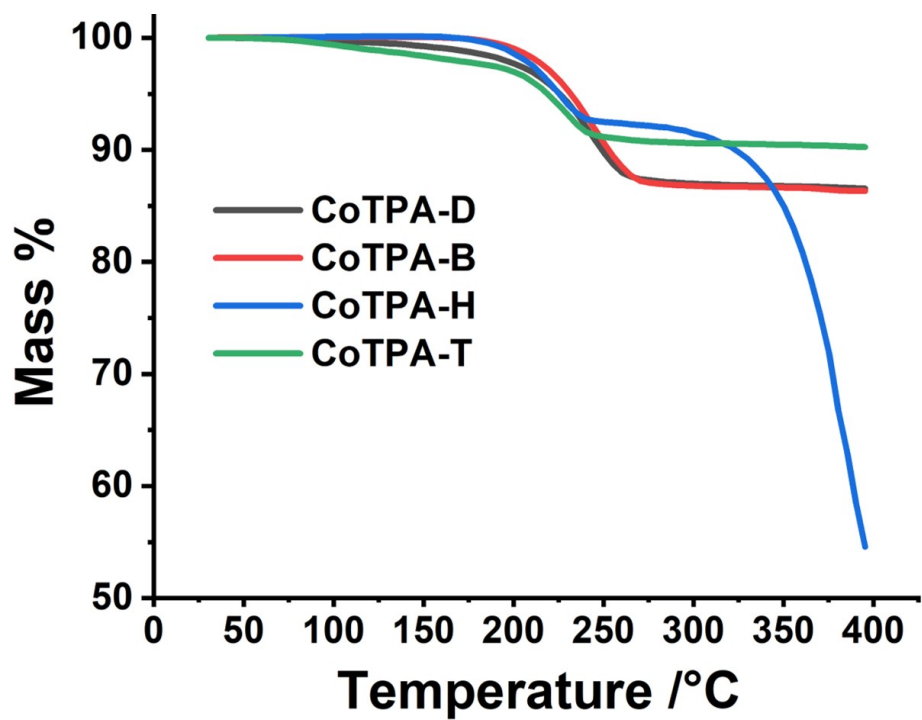

Figure S2. Thermogravimetric analysis of Co MOFs.

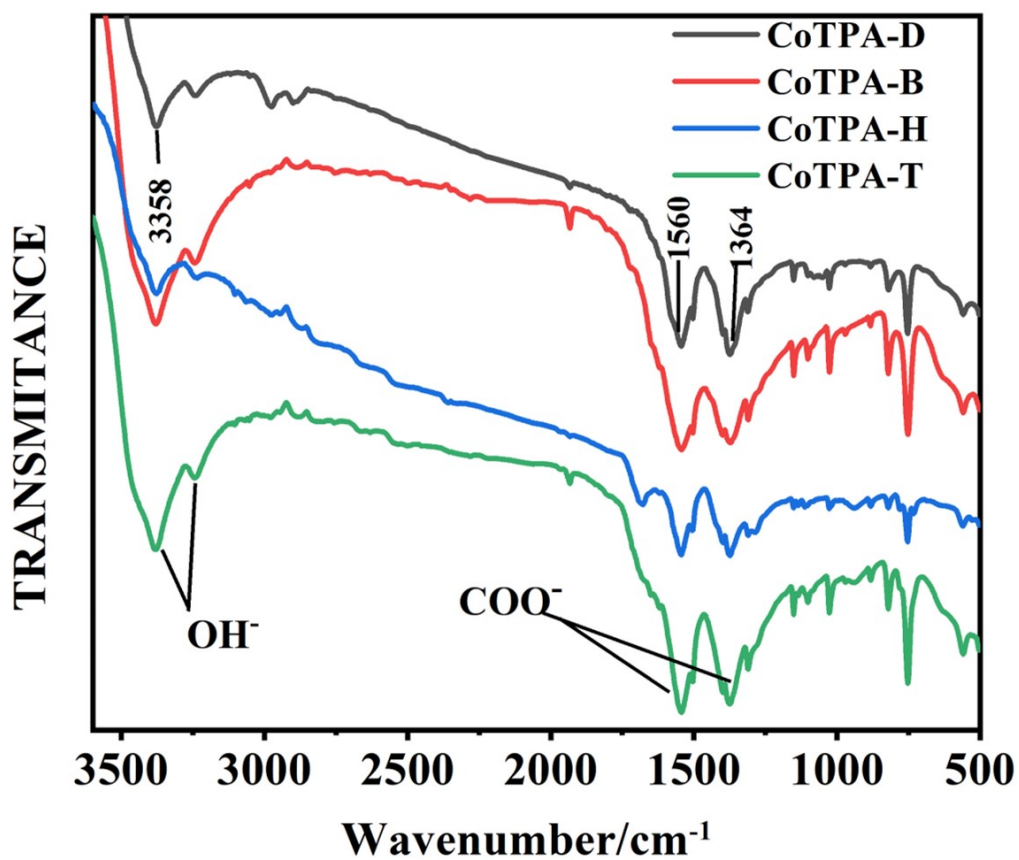

Figure S3. FTIR spectra of Co MOFs.

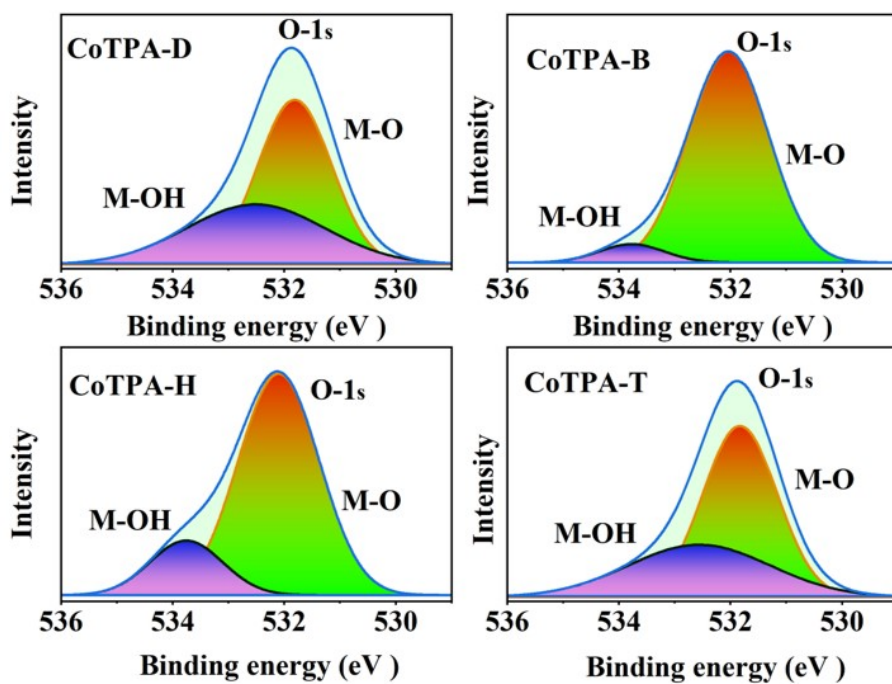

Figure S4. High-resolution O 1s XPS spectra of CoTPA-D, CoTPA-B, CoTPA-H and CoTPA-T.

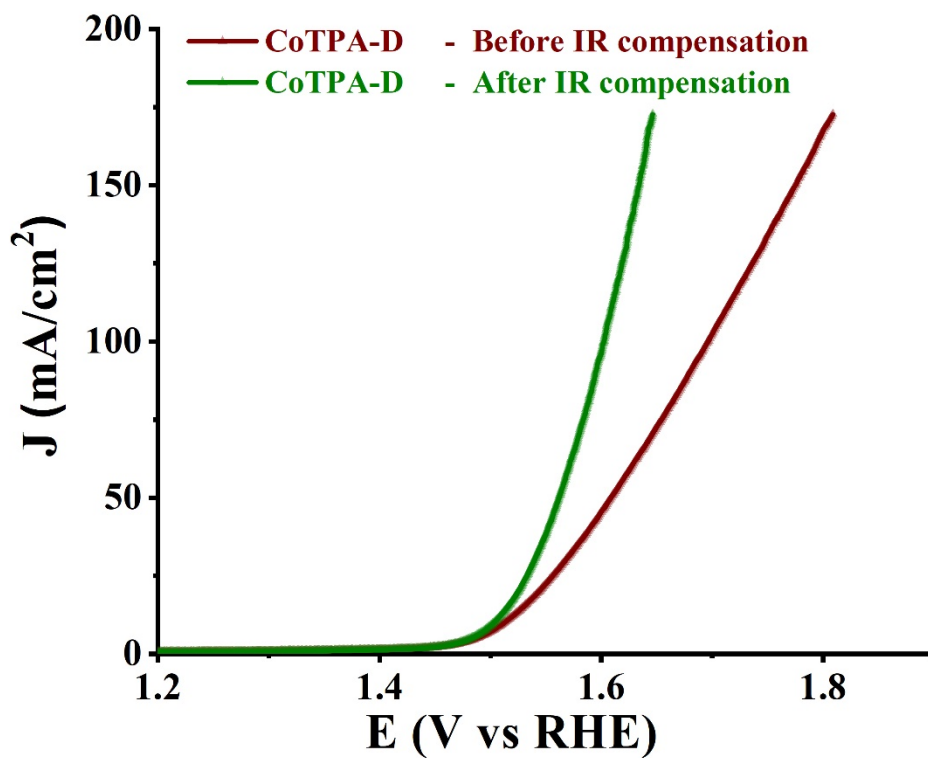

Figure S5. OER polarization curves of CoTPA-D before and after iR correction (100%).

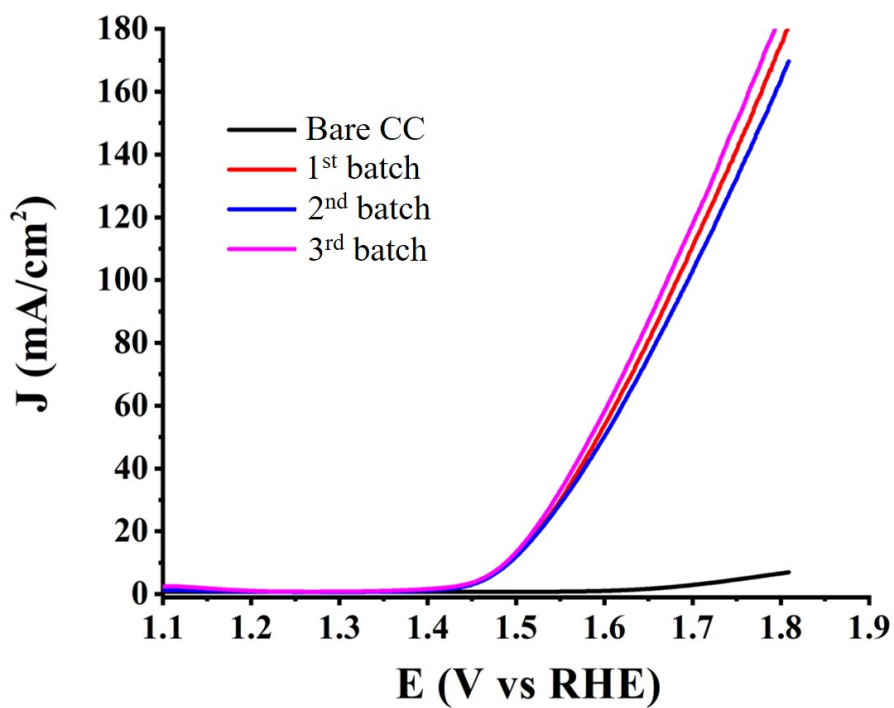

Figure S6. OER reproducibility studies of CoTPA-D.

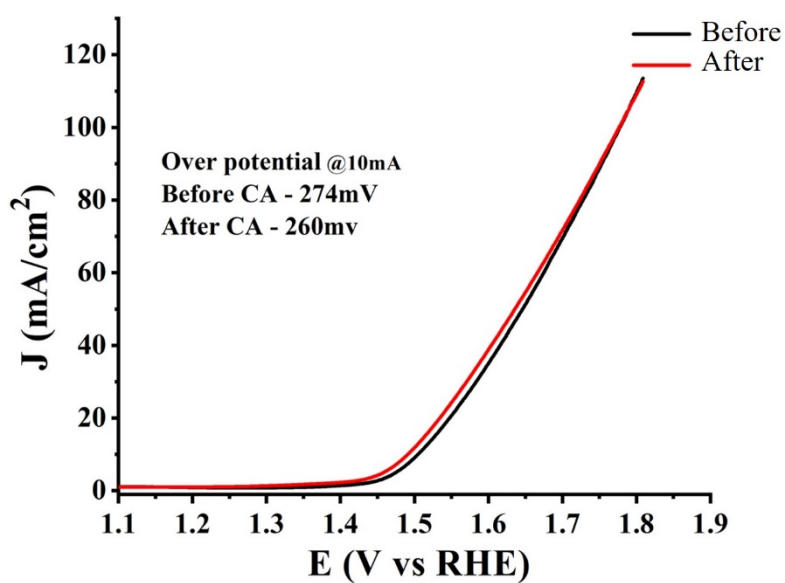

Figure S7. LSV curve of CoTPA-D before and after chronoamperometry studies for 62 h.

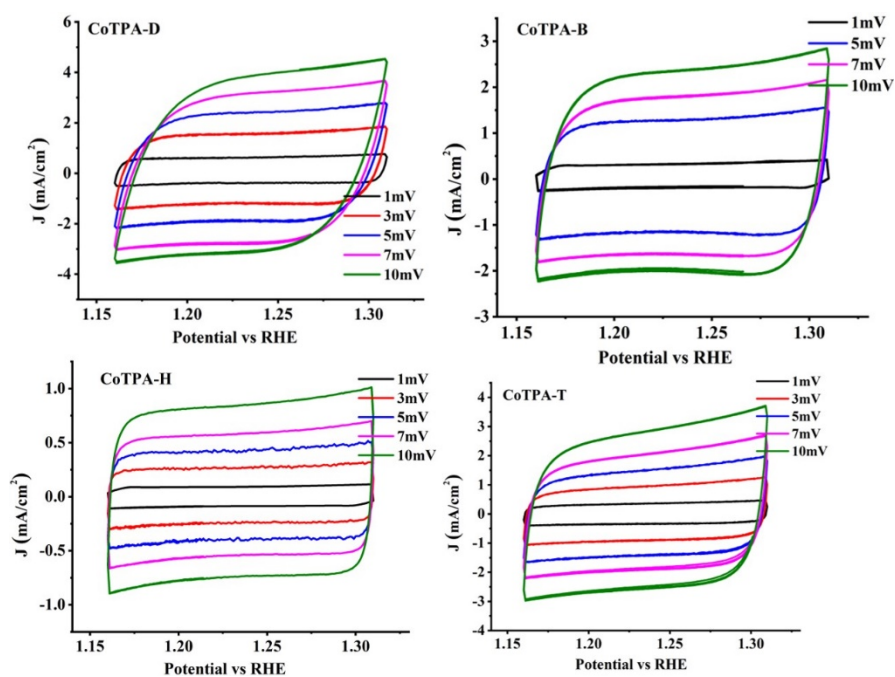

Figure S8. Double layer capacitance of Co MOFs.

Table S1. Co MOFs double layer capacitance, ECSA and roughness factor.

| Sample code | Double layer capacitance (mF/cm <sup>2</sup> ) | ECSA (cm <sup>2</sup> ) | Roughness factor |
|-------------|------------------------------------------------|-------------------------|------------------|
| CoTPA-D     | 0.3624                                         | 9.06                    | 90.6             |
| CoTPA-B     | 0.2233                                         | 5.58                    | 55.8             |
| CoTPA-H     | 0.082                                          | 2.05                    | 20.5             |
| CoTPA-T     | 0.271                                          | 6.77                    | 67.7             |
